# Supplementary material
Source: PubMed Central journal article supplement (PMC1283429)
Supplement: pnas_0505156102_1.pdf [file pnas_0505156102_1.pdf]

**TaBx1-A** 259 gacctggccacaacggcag.. 306 cgccgacgtcattgagctcg.. 355 ggtccgatcatccaggcttcga  
**TaBx1-B** 259 gacctggccacaacggcgg.. 306 cgccgacgtcattgagctcg.. 355 ggtccgatcatccaggcttdaa  
**TaBx1-D** 256 gacctggccacaacggcgg.. 303 cgccgacgtcattgagcttg.. 352 ggtccgatcatccaggcttcga

**TaBx2-A** 849 aaggatggtaagccgtgaggatgaggcccagccggcgcaagaagggaagacaaagacttcatcgacgtatccctat  
**TaBx2-B** 849 aaggatggtaagccgtgagggtgaggcccagccggagcaagaagaagacaaagacttcatcgacgtatccctat  
**TaBx2-D** 849 aaggatggtaagccgtgaggatgaggcccagccggagcaagaagaagacaaagacttcatcgacgtatccctct

**TaBx3-A** 772 ctggtttccgtcaaggctcagcgactcaacaagaggtgggacgacttggttcaacgagatcatcgagg  
**TaBx3-B** 772 ctggtttccgtcaaggctcaacgactcaacaagaggtgggacgacttggttcaacgagatcattgagg  
**TaBx3-D** 772 ctggtttccgtcaaggctcggcggctcaacaagaggtgggacgaatttggttcaacgagatcattgaag

**TaBx4-A** 1054 gtaagggagtccacacccggcgg  
**TaBx4-B** 1054 gtaagggagtccacaccccacgg  
**TaBx4-D** 1054 gtaagggagtccacacccaaggg

**TaBx5-A** 947 ttgaggcagccatagaaacatcgatatgtggtgctggaatacgccatggctgagcttatca  
**TaBx5-B** 950 ttgaggcagccatagaaacatcatatctggtgctggaatacgccatggccgagcttatca  
**TaBx5-D** 947 ttgaggcagctatagaaacatcgatatctggtgctggaatacgccatggccgagcttataa
