# Supplementary material
Source: PubMed Central journal article supplement (PMC1283429)

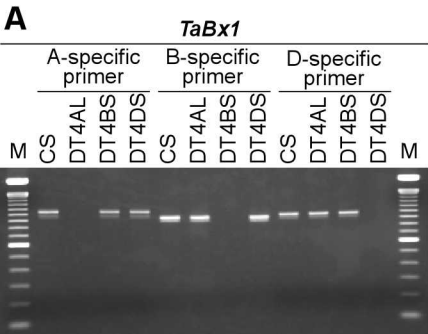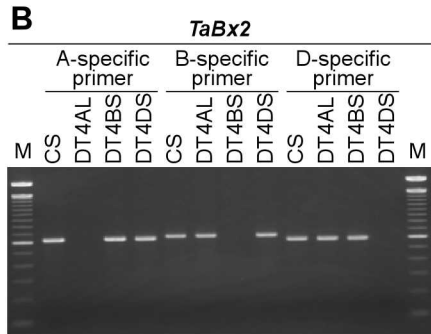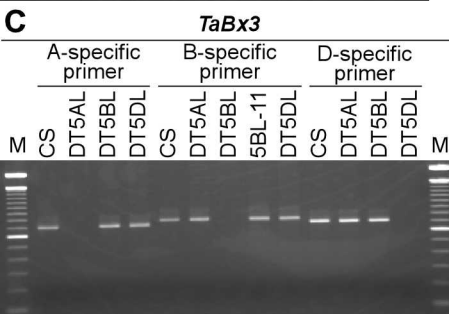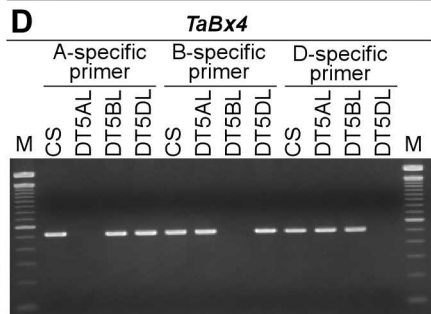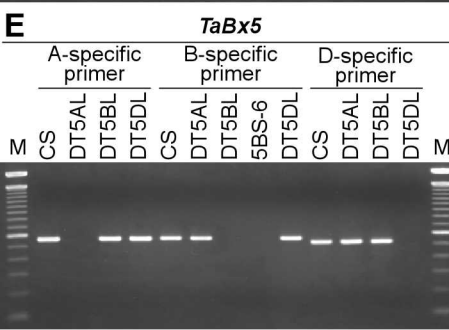

Supplement: pnas_0505156102_2.pdf [file pnas_0505156102_2.pdf]
